# Supplementary material
Source: PubMed Central journal article supplement (PMC5562163)
Supplement: NIHMS885374-supplement-Supplementary_Tables_1___2.pdf [file NIHMS885374-supplement-Supplementary_Tables_1___2.pdf]

**Table E1. MR Imaging Parameters**

| Parameter                                    | Site A             |           | Site B    |           |
|----------------------------------------------|--------------------|-----------|-----------|-----------|
|                                              | Field strength (T) | 1.5       | 3.0       | 1.5       |
| Repetition time msec/echo time msec          | 3.7/1.7            | 4.1/1.9   | 4.7/2.1   | 3.4/1.4   |
| Matrix                                       | 256 × 192          | 288 × 224 | 320 × 160 | 320 × 192 |
| Field of view (cm)                           | 36–38              | 36–38     | 34–38     | 34–38     |
| Section thickness (mm)                       | 5.0                | 3.6       | 5.0       | 4.0       |
| Flip angle (degrees)                         | 12                 | 15        | 12        | 15        |
| Approximate no. of sections*                 | 48                 | 70        | 40        | 60        |
| Partial k <sub>y</sub> acquisition (%)       | 75                 | ...       | ...       | ...       |
| Autocalibrated parallel imaging <sup>†</sup> | ...                | ×2.5      | ×1.7      | ×2.1      |

\* Could be changed depending on the size of the liver.

† Effective acceleration in time.

**Table E2. Original Reports of Patients with Self-Reported Dyspnea**

| Contrast Agent Used and Patient Age (y)/Sex | Site | Report                                                                                                                                                                                            |
|---------------------------------------------|------|---------------------------------------------------------------------------------------------------------------------------------------------------------------------------------------------------|
| <b>Gadobenate dimeglumine</b>               |      |                                                                                                                                                                                                   |
| 53/M                                        | A    | Patient complained of shortness of breath and refused to go on with the dynamic study.                                                                                                            |
| 28/F                                        | A    | Stomach hurt to the point where patient felt short of breath.                                                                                                                                     |
| <b>Gadoxetic acid</b>                       |      |                                                                                                                                                                                                   |
| 38/F                                        | A    | Difficulty holding breath during arterial phase imaging.                                                                                                                                          |
| 68/F                                        | A    | Could not hold breath for entire arterial phase, felt like wind was knocked out.                                                                                                                  |
| 65/F                                        | A    | Contrast agent took breath away, had to breathe normally to gain enough oxygen to hold breath.                                                                                                    |
| 36/F                                        | A    | Could not hold or catch breath for the entire examination after the contrast agent injection.                                                                                                     |
| 57/F                                        | A    | Could not catch breath.                                                                                                                                                                           |
| 53/F                                        | A    | Patient performed all breath holds in expiration. But during the contrast agent injection, the patient couldn't catch her breath so she held her breath on inspiration during the arterial phase. |
| 63/F                                        | A    | Difficulty holding breath after contrast agent injection.                                                                                                                                         |
| 47/F                                        | A    | Shortness of breath.                                                                                                                                                                              |
| 67/M                                        | A    | Difficulty holding breath after contrast agent injection.                                                                                                                                         |
| 44/F                                        | A    | Patient said it was hard to hold breath for postinjection imaging.                                                                                                                                |
| 60/M                                        | B    | Shortness of breath. Could not breathe well.                                                                                                                                                      |
| 51/F                                        | B    | Shortness of breath after contrast agent injection.                                                                                                                                               |
